# Supplementary material for: Exploring the stability and aromaticity of rare earth doped tin cluster MSn16− (M = Sc, Y, La)
Source: Royal Society of Chemistry journal article supplement (doi:10.1039/d3cp04803a), 2023-12-13
Supplement: d3cp04803a1.pdf [file d3cp04803a1.pdf]

## Supplementary Information for:

### Exploring the stability and aromaticity of rare earth doped tin cluster $MSn_{16}^-$ (M = Sc, Y, La)

Jin-Kun Zeng<sup>1</sup>, Huai-Qian Wang<sup>1,2,\*</sup>, Hui-Fang Li<sup>2</sup>, Hao Zheng<sup>1</sup>, Jia-Ming Zhang<sup>1</sup>, Xun-Jie Mei<sup>2</sup>, Yong-Hang Zhang<sup>1</sup> and Xun-Lei Ding<sup>3</sup>

<sup>1</sup>*College of Information Science and Engineering, Huaqiao University, Xiamen, 361021, China.*

<sup>2</sup>*College of engineering, Huaqiao University, Quanzhou, 362021, China.*

<sup>3</sup>*Department of Mathematics and Physics, North China Electric Power University, Beijing, 102206, China*

\*Corresponding authors: E-mail: hqwang@hqu.edu.cn (HQW)

## Table of Contents

**Table S1.** Calculated relative energy and HOMO-LUMO gaps of  $MSn_{16}^-$  (M = Sc, Y, La) clusters obtained by using Scalar (SR) and Spin Orbit (SO) approach as obtained at PBE0/Sc/def2-TZVP//Y/dhf-TZVP-2c//La/ECP28WMB//Sn/dhf-TZVP-2c level. (All energies are in eV).

Page 3

**Table S2.** The relative energy of a few low-lying energy isomers of  $MSn_{16}^-$  (M = Sc, Y, La) obtained at five different methods.

Page 4

**Table S3.** Calculated Cartesian coordinates for the low-lying energy isomers of  $MSn_{16}^-$  (M = Sc, Y, La) clusters at PBE0/def2-TZVP level.

Page 5~ Page 11

**Table S4.** The root-mean-square deviation (RMSD) between experimental and simulated PES (X, A, B, C in eV).

Page 12

**Figure S1** Comparing the Experimental and simulated PES of  $Sn_{16}^-$ . Comparison of two possible low-

lying isomers with experimental PES. The structure and experimental PES are extracted from ref. [S1, S2]. The relative energy is carried out at the PBE0/Lanl08(d) level. The positions of the first four peaks in the experiment are marked with the letters X, A, B, and C.

Page 13

**Figure S2.** Valence molecular orbitals diagram of  $\text{ScSn}_{16}^-$ .

Page 14

**Figure S3.** AdNDP orbits of (a)  $\text{YSn}_{16}^-$ ; (b)  $\text{LaSn}_{16}^-$ .

Page 15

**Figure S4.** ICSS curve plot along the Z-axis from the center of the (a) Sc; (b) Y; (c) La atom.

Page 16

**Supplemental References**

Page 17

**Table S1.** Calculated relative energy and HOMO-LUMO gaps of  $M\text{Sn}_{16}^-$  ( $M = \text{Sc}, \text{Y}, \text{La}$ ) clusters obtained by using Scalar (SR) and Spin Orbit (SO) approach as obtained at PBE0/Sc/def2-TZVP//Y/dhf-TZVP-2c//La/ECP28WMB//Sn/dhf-TZVP-2c level. (All energies are in eV)

| Clusters                  | SO         |      | SR         |      |
|---------------------------|------------|------|------------|------|
|                           | $\Delta E$ | Gap  | $\Delta E$ | Gap  |
| $\text{ScSn}_{16}^-$ -I   | 0.00       | 2.39 | 0.00       | 2.52 |
| $\text{ScSn}_{16}^-$ -II  | 0.79       | 1.73 | 0.82       | 1.65 |
| $\text{ScSn}_{16}^-$ -III | 1.28       | 2.16 | 1.27       | 2.21 |
| $\text{YSn}_{16}^-$ -I    | 0.00       | 2.48 | 0.00       | 2.61 |
| $\text{YSn}_{16}^-$ -II   | 0.66       | 1.79 | 0.69       | 1.71 |
| $\text{YSn}_{16}^-$ -III  | 1.41       | 2.14 | 1.40       | 2.23 |
| $\text{LaSn}_{16}^-$ -I   | 0.00       | 2.49 | 0.00       | 2.63 |
| $\text{LaSn}_{16}^-$ -II  | 0.76       | 1.83 | 0.79       | 1.75 |
| $\text{LaSn}_{16}^-$ -III | 1.80       | 2.06 | 1.79       | 2.16 |

**Table S2.** The relative energy of a few low-lying energy isomers of  $M\text{Sn}_{16}^-$  ( $M = \text{Sc}, \text{Y}, \text{La}$ ) obtained at five different methods.

| Clusters                   | PBE0 | PBE  | B3PW91 | B3LYP | DLPNO-CCSD(T) |
|----------------------------|------|------|--------|-------|---------------|
| $\text{ScSn}_{16}^-$ - I   | 0.00 | 0.00 | 0.00   | 0.00  | 0.00          |
| $\text{ScSn}_{16}^-$ - II  | 0.82 | 0.70 | 0.73   | 0.51  | 0.70          |
| $\text{ScSn}_{16}^-$ - III | 1.27 | 1.17 | 1.18   | 0.95  | 1.15          |
| $\text{YSn}_{16}^-$ - I    | 0.00 | 0.00 | 0.00   | 0.00  | 0.00          |
| $\text{YSn}_{16}^-$ - II   | 0.70 | 0.57 | 0.61   | 0.38  | 0.64          |
| $\text{YSn}_{16}^-$ - III  | 1.41 | 1.28 | 1.31   | 1.08  | 1.37          |
| $\text{LaSn}_{16}^-$ - I   | 0.00 | 0.00 | 0.00   | 0.00  | 0.00          |
| $\text{LaSn}_{16}^-$ - II  | 0.77 | 0.48 | 0.60   | 0.14  | 0.85          |
| $\text{LaSn}_{16}^-$ - III | 1.79 | 1.46 | 1.61   | 1.13  | 1.84          |

**Table S3.** Calculated Cartesian coordinates for the low-lying energy isomers of  $MSn_{16}^-$  (M = Sc, Y, La) clusters at PBE0/def2-TZVP level.

$ScSn_{16}^-$  -I

| Element | X         | Y         | Z         |
|---------|-----------|-----------|-----------|
| Sn      | 1.028905  | 3.143169  | 1.028905  |
| Sn      | 1.822917  | -1.822917 | 1.822917  |
| Sn      | -1.028905 | -3.143169 | 1.028905  |
| Sn      | 1.028905  | 1.028905  | 3.143169  |
| Sn      | 3.143169  | 1.028905  | 1.028905  |
| Sn      | 1.028905  | -1.028905 | -3.143169 |
| Sn      | -3.143169 | 1.028905  | -1.028905 |
| Sn      | -1.028905 | 3.143169  | -1.028905 |
| Sn      | 1.028905  | -3.143169 | -1.028905 |
| Sn      | -1.028905 | 1.028905  | -3.143169 |
| Sn      | -1.028905 | -1.028905 | 3.143169  |
| Sn      | 3.143169  | -1.028905 | -1.028905 |
| Sn      | -3.143169 | -1.028905 | 1.028905  |
| Sn      | -1.822917 | 1.822917  | 1.822917  |
| Sn      | 1.822917  | 1.822917  | -1.822917 |
| Sn      | -1.822917 | -1.822917 | -1.822917 |
| Sc      | 0.000000  | 0.000000  | 0.000000  |

$ScSn_{16}^-$  -II

| Element | X         | Y         | Z         |
|---------|-----------|-----------|-----------|
| Sn      | -1.460383 | 1.852343  | 2.321779  |
| Sn      | 0.000000  | 2.136837  | -2.403457 |
| Sn      | -1.460383 | -1.852343 | 2.321779  |
| Sn      | 0.000000  | -2.136837 | -2.403457 |

|    |           |           |           |
|----|-----------|-----------|-----------|
| Sn | -2.267435 | 0.000000  | -2.355253 |
| Sn | -3.341521 | 0.000000  | 0.912027  |
| Sn | 1.460383  | 1.852343  | 2.321779  |
| Sn | 2.469987  | -2.440464 | -0.593742 |
| Sc | 0.000000  | 0.000000  | 0.109931  |
| Sn | -2.469987 | 2.440464  | -0.593742 |
| Sn | -2.469987 | -2.440464 | -0.593742 |
| Sn | 1.460383  | -1.852343 | 2.321779  |
| Sn | 2.469987  | 2.440464  | -0.593742 |
| Sn | 0.000000  | -3.864515 | 0.367523  |
| Sn | 0.000000  | 3.864515  | 0.367523  |
| Sn | 2.267435  | 0.000000  | -2.355253 |
| Sn | 3.341521  | 0.000000  | 0.912027  |

ScSn<sub>16</sub><sup>-III</sup>

| Element | X         | Y         | Z         |
|---------|-----------|-----------|-----------|
| Sn      | -2.243036 | -1.711650 | 1.872985  |
| Sn      | 2.533327  | -0.344711 | 2.243410  |
| Sn      | -2.554669 | 1.236375  | 1.515221  |
| Sn      | 0.560488  | -2.523813 | -2.680884 |
| Sn      | -0.579463 | -3.510914 | 0.000000  |
| Sn      | -1.303488 | 3.527773  | 0.000000  |
| Sn      | 1.587217  | 4.512647  | 0.000000  |
| Sn      | 1.070698  | 2.066382  | -1.487442 |
| Sn      | -0.390851 | 0.267113  | 3.454671  |
| Sn      | -2.554669 | 1.236375  | -1.515221 |
| Sn      | 0.560488  | -2.523813 | 2.680884  |
| Sn      | -2.243036 | -1.711650 | -1.872985 |
| Sn      | -0.390851 | 0.267113  | -3.454671 |

|    |           |           |           |
|----|-----------|-----------|-----------|
| Sn | 1.070698  | 2.066382  | 1.487442  |
| Sn | 2.533327  | -0.344711 | -2.243410 |
| Sn | 2.357233  | -2.377692 | 0.000000  |
| Sc | -0.031935 | -0.312397 | 0.000000  |

YSn<sub>16</sub><sup>-</sup>-I

| Element | X         | Y         | Z         |
|---------|-----------|-----------|-----------|
| Sn      | 1.035402  | 3.160370  | 1.035402  |
| Sn      | 1.861908  | -1.861908 | 1.861908  |
| Sn      | -1.035402 | -3.160370 | 1.035402  |
| Sn      | 1.035402  | 1.035402  | 3.160370  |
| Sn      | 3.160370  | 1.035402  | 1.035402  |
| Sn      | 1.035402  | -1.035402 | -3.160370 |
| Sn      | -3.160370 | 1.035402  | -1.035402 |
| Sn      | -1.035402 | 3.160370  | -1.035402 |
| Sn      | 1.035402  | -3.160370 | -1.035402 |
| Sn      | -1.035402 | 1.035402  | -3.160370 |
| Sn      | -1.035402 | -1.035402 | 3.160370  |
| Sn      | 3.160370  | -1.035402 | -1.035402 |
| Sn      | -3.160370 | -1.035402 | 1.035402  |
| Sn      | -1.861908 | 1.861908  | 1.861908  |
| Sn      | 1.861908  | 1.861908  | -1.861908 |
| Sn      | -1.861908 | -1.861908 | -1.861908 |
| Y       | 0.000000  | 0.000000  | 0.000000  |

YSn<sub>16</sub><sup>-</sup>-II

| Element | X | Y | Z |
|---------|---|---|---|
|         |   |   |   |

|    |           |           |           |
|----|-----------|-----------|-----------|
| Sn | -1.479706 | 1.951512  | 2.344812  |
| Sn | 0.000000  | 2.152954  | -2.442461 |
| Sn | -1.479706 | -1.951512 | 2.344812  |
| Sn | 0.000000  | -2.152954 | -2.442461 |
| Sn | -2.309605 | 0.000000  | -2.373459 |
| Sn | -3.328427 | 0.000000  | 0.975503  |
| Sn | 1.479706  | 1.951512  | 2.344812  |
| Sn | 2.496116  | -2.446092 | -0.603888 |
| Y  | 0.000000  | 0.000000  | 0.118930  |
| Sn | -2.496116 | 2.446092  | -0.603888 |
| Sn | -2.496116 | -2.446092 | -0.603888 |
| Sn | 1.479706  | -1.951512 | 2.344812  |
| Sn | 2.496116  | 2.446092  | -0.603888 |
| Sn | 0.000000  | -3.869623 | 0.312185  |
| Sn | 0.000000  | 3.869623  | 0.312185  |
| Sn | 2.309605  | 0.000000  | -2.373459 |
| Sn | 3.328427  | 0.000000  | 0.975503  |

YSn<sub>16</sub><sup>-</sup> -III

| Element | X         | Y         | Z         |
|---------|-----------|-----------|-----------|
| Sn      | -2.176739 | -1.802533 | 2.046572  |
| Sn      | 2.592632  | -0.265420 | 2.193413  |
| Sn      | -2.733573 | 1.086678  | 1.526305  |
| Sn      | 0.678317  | -2.474880 | -2.697718 |
| Sn      | -0.58632  | -3.50626  | 0.000000  |
| Sn      | -1.378072 | 3.299787  | 0.000000  |
| Sn      | 1.357279  | 4.666933  | 0.000000  |
| Sn      | 1.145578  | 2.189516  | -1.511245 |
| Sn      | -0.374372 | 0.344102  | 3.446731  |



|    |           |           |           |
|----|-----------|-----------|-----------|
| Sn | -2.733573 | 1.086678  | -1.526305 |
| Sn | 0.6783170 | -2.474880 | 2.697718  |
| Sn | -2.176739 | -1.802533 | -2.046572 |
| Sn | -0.374372 | 0.344102  | -3.446731 |
| Sn | 1.145578  | 2.189516  | 1.511245  |
| Sn | 2.592632  | -0.265420 | -2.193413 |
| Sn | 2.402066  | -2.410245 | 0.000000  |
| Y  | -0.075179 | -0.262999 | 0.000000  |

LaSn<sub>16</sub><sup>-I</sup>

| Element | X         | Y         | Z         |
|---------|-----------|-----------|-----------|
| Sn      | 1.043687  | 3.185318  | 1.043687  |
| Sn      | 1.900874  | -1.900874 | 1.900874  |
| Sn      | -1.043687 | -3.185318 | 1.043687  |
| Sn      | 1.043687  | 1.043687  | 3.185318  |
| Sn      | 3.185318  | 1.043687  | 1.043687  |
| Sn      | 1.043687  | -1.043687 | -3.185318 |
| Sn      | -3.185318 | 1.043687  | -1.043687 |
| Sn      | -1.043687 | 3.185318  | -1.043687 |
| Sn      | 1.043687  | -3.185318 | -1.043687 |
| Sn      | -1.043687 | 1.043687  | -3.185318 |
| Sn      | -1.043687 | -1.043687 | 3.185318  |
| Sn      | 3.185318  | -1.043687 | -1.043687 |
| Sn      | -3.185318 | -1.043687 | 1.043687  |
| Sn      | -1.900874 | 1.900874  | 1.900874  |
| Sn      | 1.900874  | 1.900874  | -1.900874 |
| Sn      | -1.900874 | -1.900874 | -1.900874 |
| La      | 0.000000  | 0.000000  | 0.000000  |

LaSn<sub>16</sub><sup>-</sup>-II

| Element | X         | Y         | Z         |
|---------|-----------|-----------|-----------|
| Sn      | -1.516189 | 2.082220  | 2.403022  |
| Sn      | 0.000000  | 2.171873  | -2.529973 |
| Sn      | -1.516189 | -2.082220 | 2.403022  |
| Sn      | 0.000000  | -2.171873 | -2.529973 |
| Sn      | -2.428751 | 0.000000  | -2.431578 |
| Sn      | -3.365960 | 0.000000  | 1.096702  |
| Sn      | 1.516189  | 2.082220  | 2.403022  |
| Sn      | 2.570006  | -2.498669 | -0.634425 |
| La      | 0.000000  | 0.000000  | 0.132142  |
| Sn      | -2.570006 | 2.498669  | -0.634425 |
| Sn      | -2.570006 | -2.498669 | -0.634425 |
| Sn      | 1.516189  | -2.082220 | 2.403022  |
| Sn      | 2.570006  | 2.498669  | -0.634425 |
| Sn      | 0.000000  | -3.943014 | 0.252333  |
| Sn      | 0.000000  | 3.943014  | 0.252333  |
| Sn      | 2.428751  | 0.000000  | -2.431578 |
| Sn      | 3.365960  | 0.000000  | 1.096702  |

LaSn<sub>16</sub><sup>-</sup>-III

| Element | X         | Y         | Z         |
|---------|-----------|-----------|-----------|
| Sn      | -2.169058 | -1.864525 | 2.224307  |
| Sn      | 2.709324  | -0.232420 | 2.200419  |
| Sn      | -2.897817 | 1.016959  | 1.559078  |
| Sn      | 0.763222  | -2.465840 | -2.792684 |

|    |           |           |           |
|----|-----------|-----------|-----------|
| Sn | -0.655518 | -3.598442 | 0.000000  |
| Sn | -1.442671 | 3.248685  | 0.000000  |
| Sn | 1.259111  | 4.816045  | 0.000000  |
| Sn | 1.219769  | 2.270090  | -1.539631 |
| Sn | -0.379280 | 0.443550  | 3.529683  |
| Sn | -2.897817 | 1.016959  | -1.559078 |
| Sn | 0.763222  | -2.465840 | 2.792684  |
| Sn | -2.169058 | -1.864525 | -2.224307 |
| Sn | -0.379280 | 0.443550  | -3.529683 |
| Sn | 1.219769  | 2.270090  | 1.539631  |
| Sn | 2.709324  | -0.232420 | -2.200419 |
| Sn | 2.462459  | -2.493461 | 0.000000  |
| La | -0.101492 | -0.270575 | 0.000000  |

**Table S4.** The root-mean-square deviation (RMSD) between experimental and simulated PES (X, A, B, C in eV) for  $\text{Sn}_{16}^-$ .

|                      | X    | A    | B    | C    | RMSD  |
|----------------------|------|------|------|------|-------|
| Exp. <sup>[S1]</sup> | 2.98 | 3.64 | 3.84 | 4.32 | /     |
| Isomer A             | 3.00 | 3.72 | 3.82 | 4.24 | 0.058 |
| Isomer B             | 2.88 | 3.48 | 3.76 | 4.28 | 0.104 |

As shown in Table S2 and Figure S1, the isomer A match the PES better than isomer B. DFT calculations indicate that isomer A has lower energy than B, which is consistent with the ref. [S2]. Isomer A is the most likely lowest energy isomer, both in terms of DFT calculations and PES and TIED [S2] experiment. In addition, the result is also consistent with ref. [S3]. Therefore, we consider isomer A as the lowest energy structure for pure  $\text{Sn}_{16}^-$  cluster in this article.

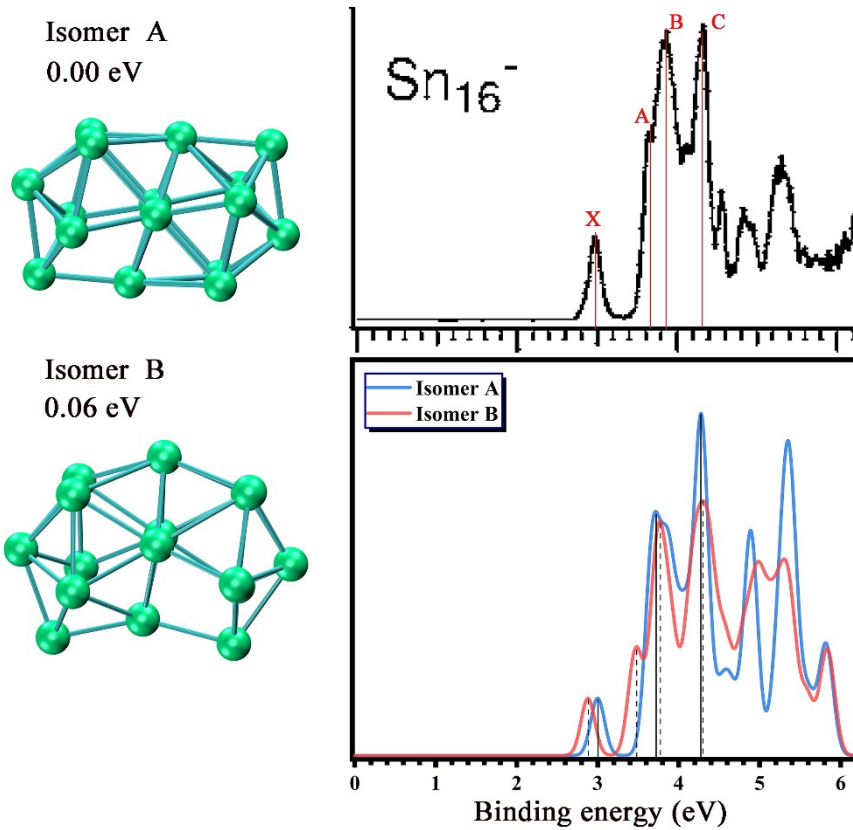

**Figure S1** Comparing the Experimental and simulated PES of  $\text{Sn}_{16}^-$ . Comparison of two possible low-lying isomers with experimental PES. The structure and experimental PES are extracted from refs. [S1, S2]. The relative energy is carried out at the PBE0/Lanl08(d) level. The positions of the first four peaks in the experiment are marked with the letters X, A, B, and C.

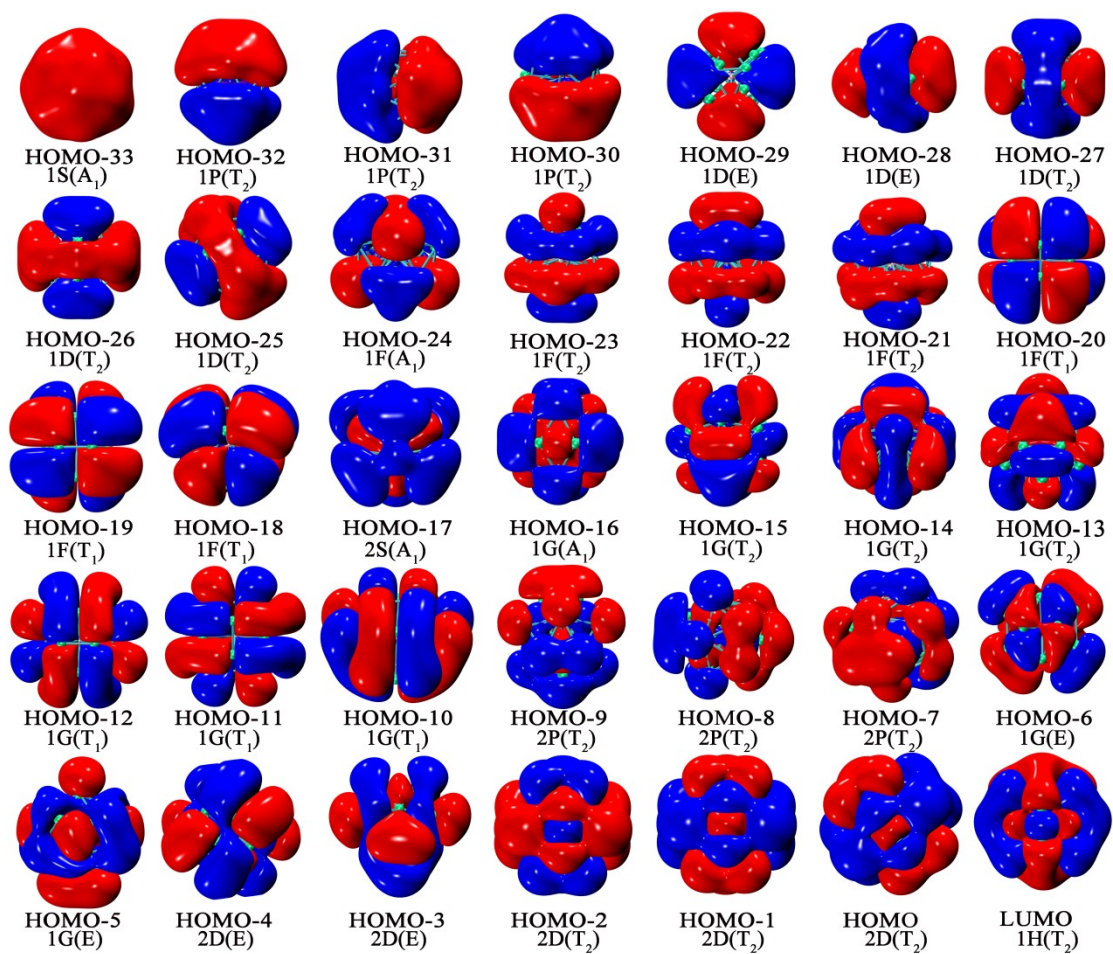

Figure S2. Valence molecular orbitals diagram of ScSn<sub>16</sub><sup>-</sup>.

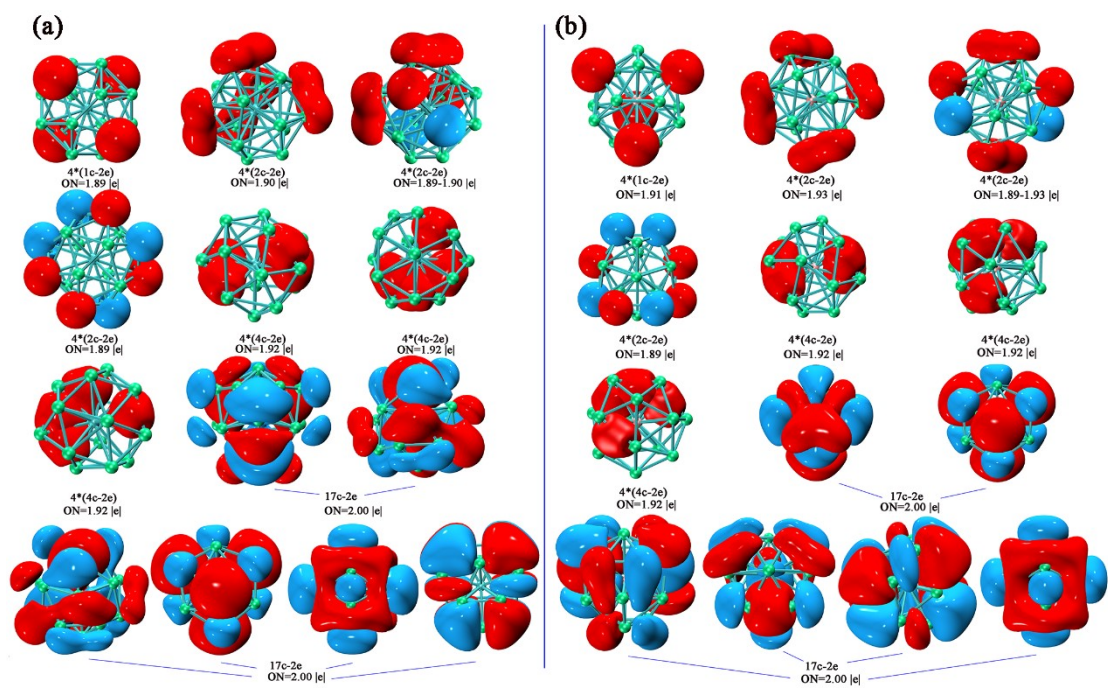

Figure S3. AdNDP orbitals of (a)  $\text{YSn}_{16}^-$ ; (b)  $\text{LaSn}_{16}^-$ .

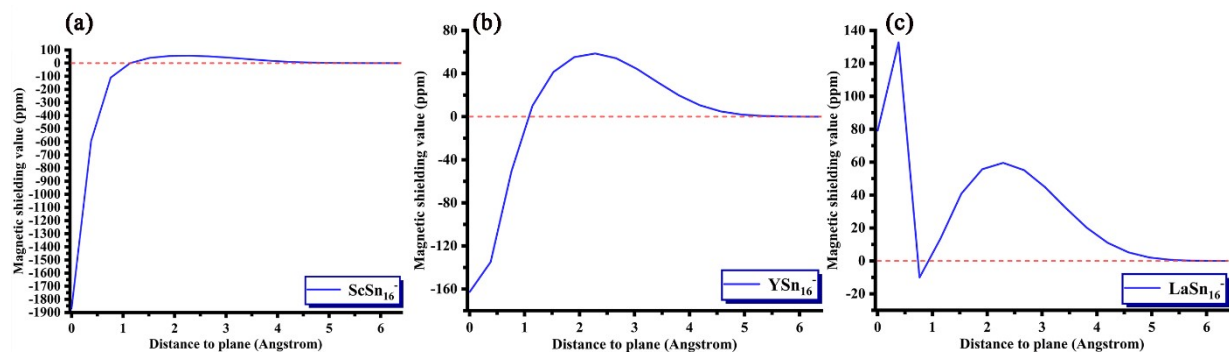

**Figure S4.** ICSS curve plot along the Z-axis from the center of the (a) Sc; (b) Y; (c) La atom.



### Supplemental References

- [1] L.F. Cui, L.M. Wang and L.S. Wang, *J. Chem. Phys.*, 2007, **126**, 64505.
- [2] A. Wiesel, N. Drebov, T. Rapps, R. Ahlrichs, U. Schwarz, R. Kelting, P. Weis, M. M. Kappes and D. Schooss, *Phys. Chem. Chem. Phys.*, 2012, **14**, 234-245.
- [3] D. Wu, D.Y. Q. X. Wu, R.L. Shi, L.W. Sai, X.Q. Liang, X.M. Huang and J.J. Zhao, *J. Chem. Phys.*, 2019, **150**, 174304.
